# Supplementary material
Source: Springer Nature journal article supplement (https://www.springermedizin.de/resource/supplementary/13075_2012_3787_MOESM2_ESM.pdf/9695330)

$p = 0.90$  (Wilcoxon)

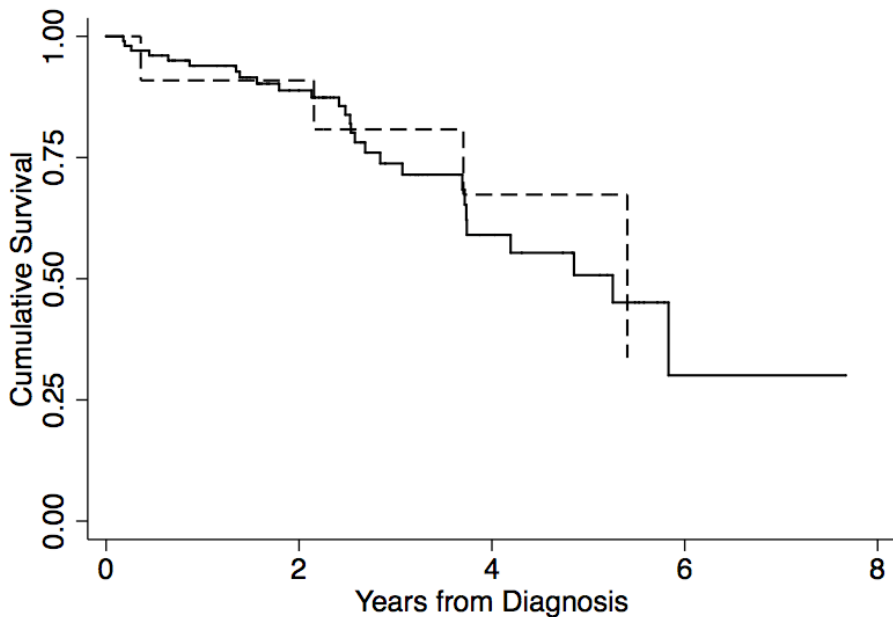

Number at risk  
Other CTD 13 9 5 1 1  
Systemic Sclerosis 103 61 18 2 1

----- Other CTD      — Systemic Sclerosis

Supplement: MOESM2 [file 9695330]
